# Supplementary material for: Isolation, Structural Characterization, and Hypoglycemic Activities In Vitro of Polysaccharides from Pleurotus eryngii
Source: Molecules. 2022 Oct 21;27(20):7140. doi: 10.3390/molecules27207140 (PMC9609144; doi:10.3390/molecules27207140)
Supplement: Supplementary file 1 [file molecules-27-07140-s001.zip › molecules-1959126-supplementary.pdf]

## Supplementary Materials

# Isolation, Structural Characterization, and Hypoglycemic Activities In Vitro of Polysaccharides from *Pleurotus eryngii*

Pin Gong <sup>1,†</sup>, Hui Long <sup>1,†</sup>, Yuxi Guo <sup>1,†</sup>, Siyuan Wang <sup>1</sup>, Fuxin Chen <sup>2</sup> and Xuefeng Chen <sup>1,\*</sup>

<sup>1</sup> School of Food and Biological Engineering, Shaanxi University of Science and Technology, Xi'an 710021, China

<sup>2</sup> School of Chemistry and Chemical Engineering, Xi'an University of Science and Technology, Xi'an 710054, China

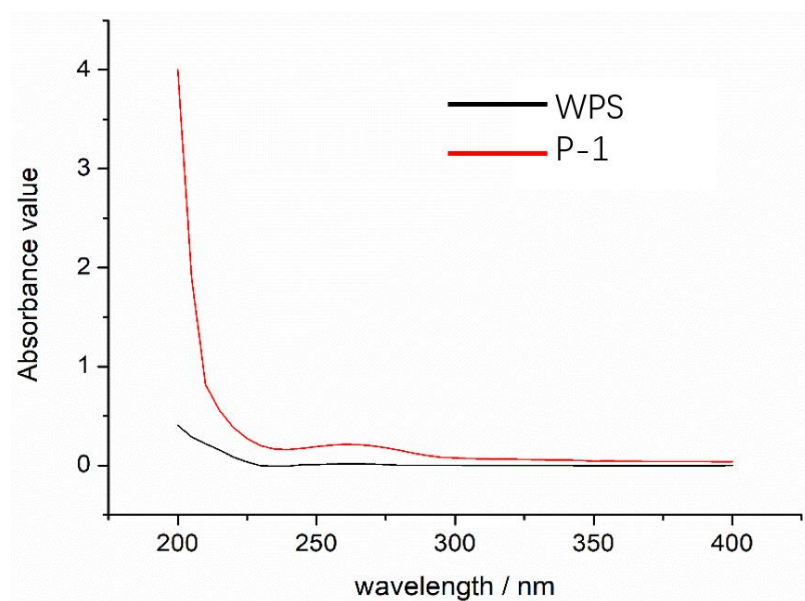

Figure S1. Ultraviolet full-wavelength scanning of PEP (WPS and P-1).

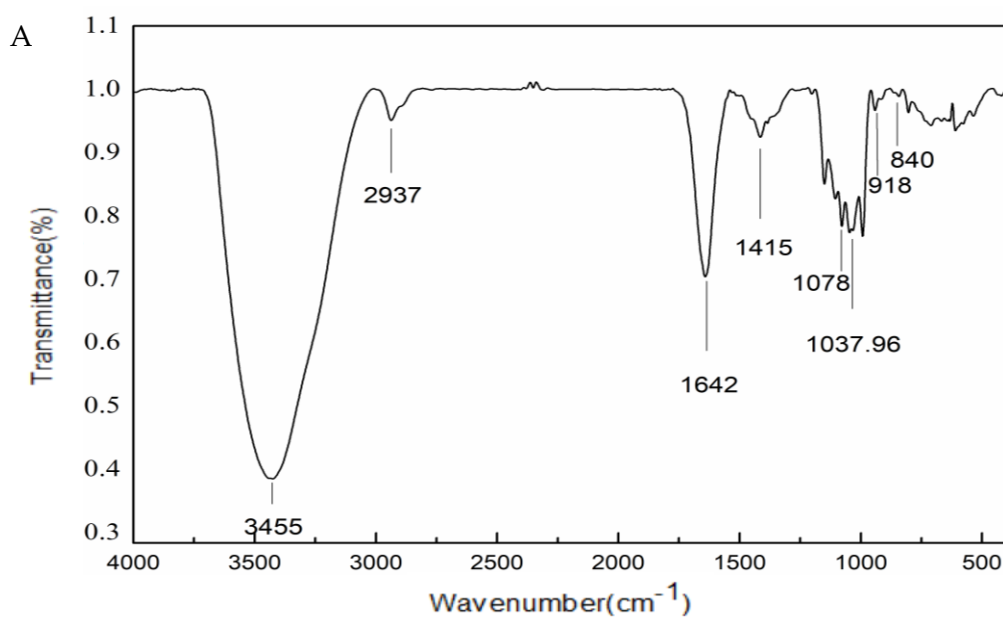

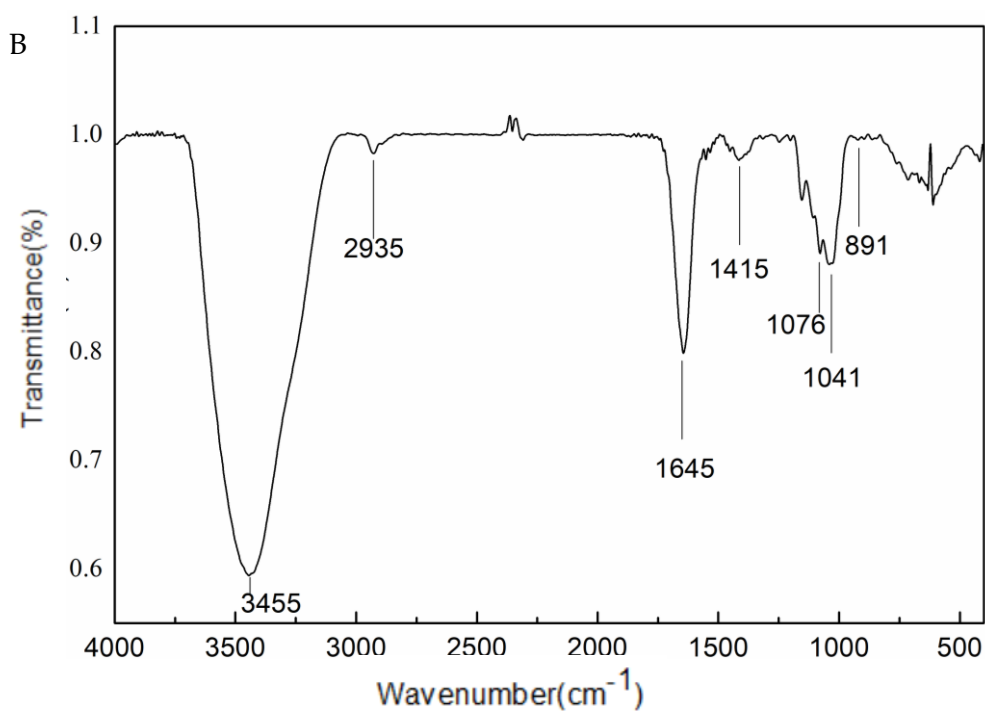

**Figure S2.** IR spectra of different PEPs (A) WPS. (B) P-1.

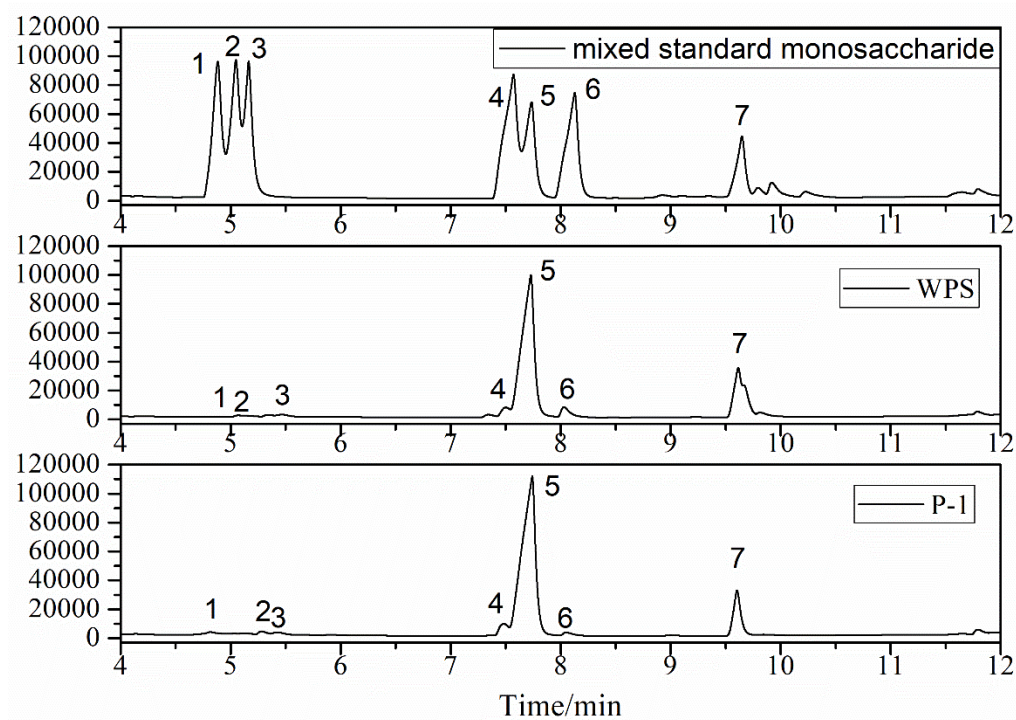

**Figure S3.** GC of PEPs (A)WPS. (B) P-1. (C) GC of mixed standard monosaccharide. 1. rhamnose; 2. arabinose; 3. xylose; 4. mannose; 5. glucose; 6 galactose; 7. internal standard.

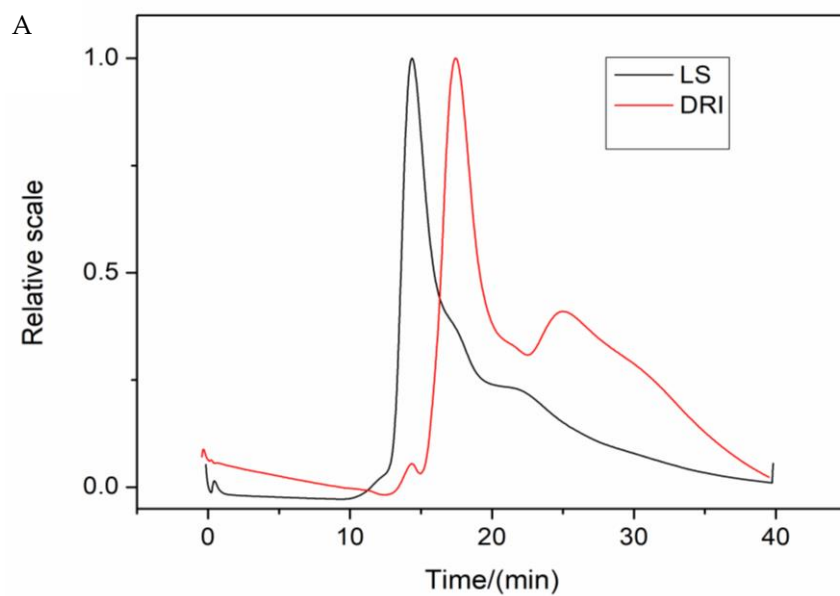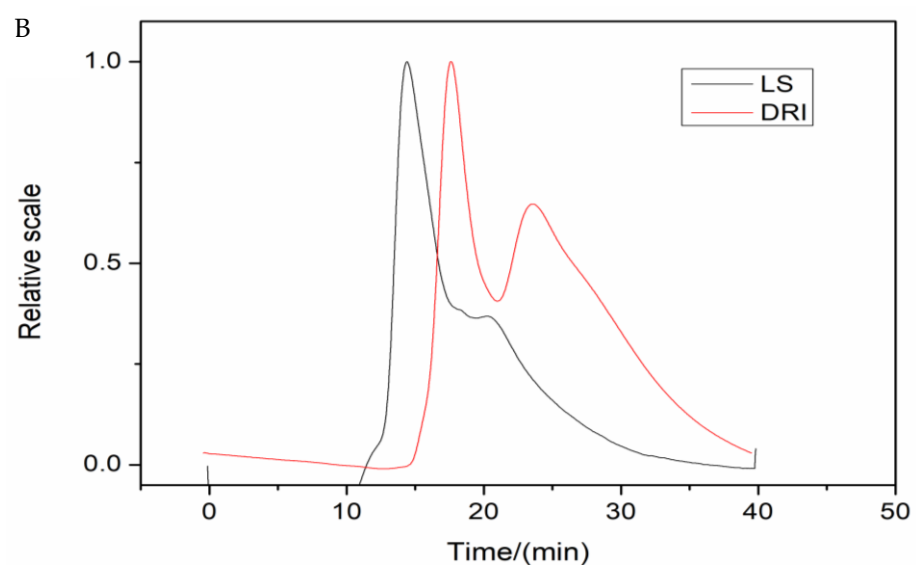

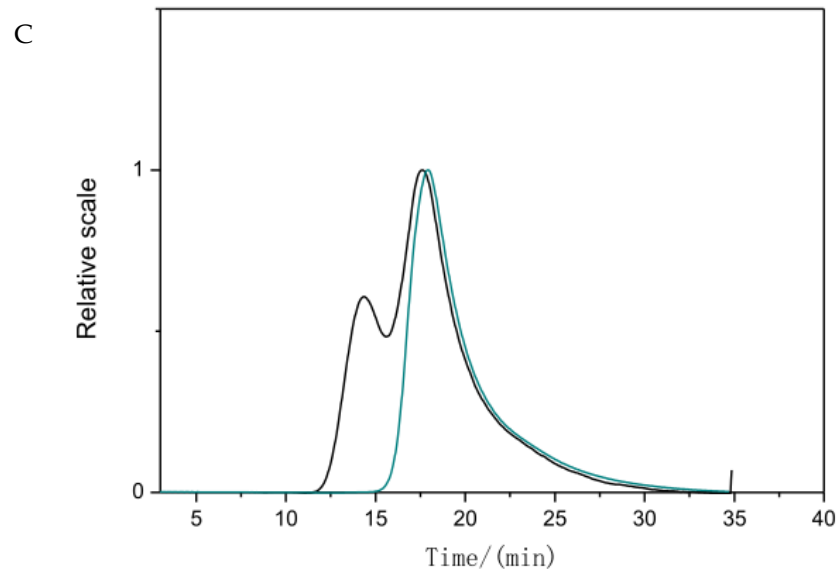

**Figure S4.** Gel Permeation Chromatography (GPC) spectrum of PEPs (A) GPC spectrum of WPS. (B) GPC spectrum of P-1. (C) GPC spectrum of glucan.

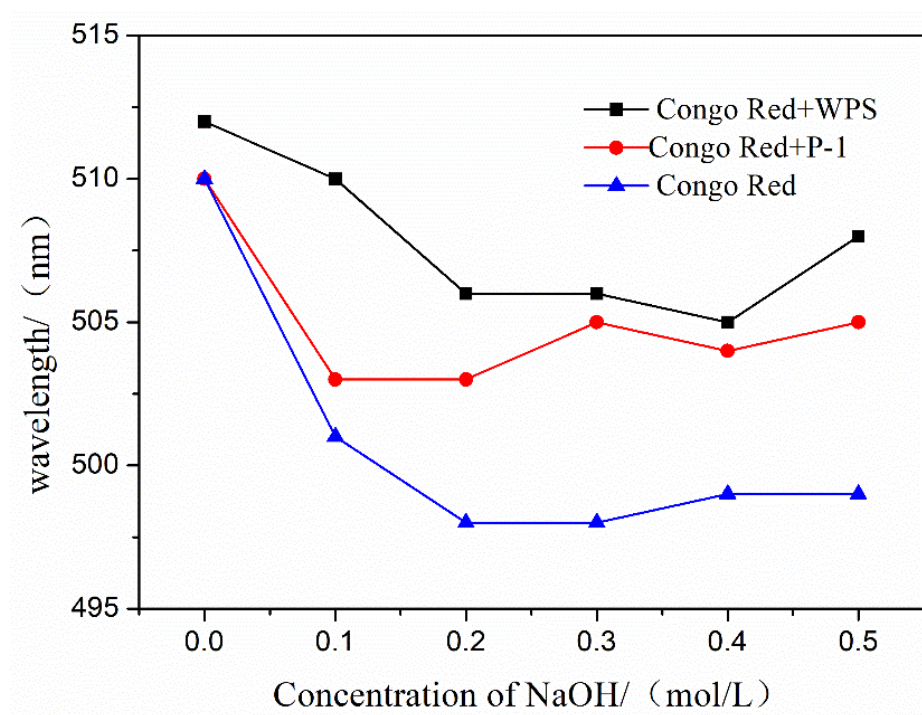

**Figure S5.** Congo red test of PEPs (WPS and P-1).
